# Supplementary material
Source: PubMed Central journal article supplement (PMC59824)
Supplement: pnas_211536998_7.pdf [file pnas_211536998_7.pdf]

Supporting information for Stanger *et al.* (October 2, 2001) *Proc. Natl. Acad. Sci. USA*, 10.1073/pnas.211536998.

**Table 2.  $\beta$ -Hairpin population for a series of peptides with a Tyr to Ala mutation in the core**

| Peptide       | Val # 1<br>Population | Val # 2<br>Population | Orn<br>Population | Ile<br>Population | Average<br>$\Delta\Delta G$ (Kcal/mol) |
|---------------|-----------------------|-----------------------|-------------------|-------------------|----------------------------------------|
| DP, Y2→A      | 38%                   | 55%                   | 38%               | 19%               | -                                      |
| DP-TA, Y4→A   | 45%                   | 59%                   | 47%               | 24%               | -0.16 ± 0.08                           |
| DP-TA2, Y6→A  | 45%                   | 59%                   | 44%               | 21%               | -0.12 ± 0.06                           |
| DP-ST/Y, Y4→A | 52%                   | 59%                   | 50%               | 24%               | -0.23 ± 0.16                           |
| DP-ST/Y, Y6→A | 52%                   | 59%                   | 50%               | 24%               | -0.23 ± 0.16                           |

$\beta$ -Hairpin population calculated at each indicator residue (listed from N- to C-terminus) from  $\delta\alpha H$  data according to equation 1 (the reference peptides had the Y→A alteration). Calculations as described in Table 1 legend.
