# Supplementary material
Source: PubMed Central journal article supplement (PMC59824)
Supplement: pnas_211536998_8.pdf [file pnas_211536998_8.pdf]

Supporting information for Stanger *et al.* (October 2, 2001) *Proc. Natl. Acad. Sci. USA*, 10.1073/pnas.211536998.

**Table 3.** NOEs observed for <sup>D</sup>P-TT<sub>2</sub> in aqueous solution (100 mM acetic acid buffer, pH 3.8, 4°C)

| Residue      | H-atom       | Residue    | H-atom       | NOE intensity |
|--------------|--------------|------------|--------------|---------------|
| Thr-2        | H $\alpha$   | Thr-19     | H $\alpha$   | Medium        |
| Thr-4        | H $\gamma$   | Tyr-6      | H $\delta$   | Medium        |
|              | H $\gamma$   | Leu-15     | H $\delta$ 1 | Medium        |
|              | H $\gamma$   | Leu-15     | H $\delta$ 2 | Medium        |
|              | H $\beta$    | Leu-15     | H $\delta$ 1 | Weak          |
|              | H $\beta$    | Leu-15     | H $\delta$ 2 | Weak          |
| Arg-5        | HN           | Gln-16     | HN           | Strong        |
| Tyr-6        | H $\alpha$   | Leu-15     | H $\alpha$   | Strong        |
|              | H $\beta$ 1  | Lys-13     | H $\delta$   | Medium        |
|              | H $\beta$ 2  | Lys-13     | H $\delta$   | Medium        |
|              | H $\delta$   | Lys-13     | H $\beta$    | Medium        |
|              | H $\delta$   | Lys-13     | H $\delta$   | Strong        |
|              | H $\delta$   | Lys-13     | H $\gamma$   | Strong        |
|              | H $\delta$   | Leu-15     | H $\alpha$   | Strong        |
|              | H $\delta$   | Leu-15     | H $\beta$ 1  | Weak          |
|              | H $\delta$   | Leu-15     | H $\delta$ 1 | Weak          |
|              | H $\delta$   | Leu-15     | H $\gamma$   | Very Weak     |
|              | H $\delta$   | Ile-14     | H $\gamma$   | Weak          |
|              | H $\epsilon$ | Leu-15     | H $\delta$ 1 | Strong        |
|              | H $\epsilon$ | Leu-15     | H $\delta$ 2 | Strong        |
|              | H $\epsilon$ | Leu-15     | H $\beta$ 1  | Weak          |
|              | H $\epsilon$ | Leu-15     | H $\alpha$   | Weak          |
|              | H $\epsilon$ | Leu-15     | H $\beta$ 2  | Strong        |
| H $\epsilon$ | Lys-13       | H $\gamma$ | Medium       |               |
| H $\epsilon$ | Lys-13       | H $\gamma$ | Weak         |               |
| Val-7        | HN           | Ile-14     | HN           | Medium        |
| Glu-8        | H $\alpha$   | Lys-13     | H $\alpha$   | Strong        |

| <b>Residue</b> | <b>H-atom</b> | <b>Residue</b> | <b>H-atom</b> | <b>NOE intensity</b> |
|----------------|---------------|----------------|---------------|----------------------|
| Val-9          | HN            | Lys-13         | HN            | Strong               |
|                | H $\gamma$    | DPro 10        | H $\alpha$    | Medium               |
|                | H $\gamma$    | DPro 10        | H $\beta$ 1   | Weak                 |
| Val-9          | H $\gamma$    | DPro 10        | H $\delta$    | Strong               |
|                | H $\alpha$    | DPro 10        | H $\delta$    | Strong               |
| Gly-11         | HN            | Lys-12         | HN            | Strong               |
