# Supplementary material
Source: PubMed Central journal article supplement (PMC59824)
Supplement: pnas_211536998_9.pdf [file pnas_211536998_9.pdf]

Supporting information for Stanger *et al.* (October 2, 2001) *Proc. Natl. Acad. Sci. USA*, 10.1073/pnas.211536998.

**Table 4.** Proton resonances (ppm) for  $D^1P$  in 9:1 H<sub>2</sub>O/D<sub>2</sub>O (4°C)

| Residue                    | N-H        | $\alpha$ H | $\beta$ H  | Others                                                                                                                                            |
|----------------------------|------------|------------|------------|---------------------------------------------------------------------------------------------------------------------------------------------------|
| <b>Arg</b>                 | —          | 4.04       | 1.89       | $\gamma$ CH <sub>2</sub> 1.54<br>$\delta$ CH <sub>2</sub> 3.18<br>$\epsilon$ NH 7.25                                                              |
| <b>Tyr</b>                 | 9.02       | 5.13       | 2.84, 2.77 | 2,6 H 6.96<br>3,5 H 6.80                                                                                                                          |
| <b>Val</b>                 | 8.86       | 4.32       | 1.97       | $\gamma$ CH <sub>3</sub> 0.83                                                                                                                     |
| <b>Glu</b>                 | 8.62       | 4.89       | 1.87       | $\gamma$ CH <sub>2</sub> 2.35, 1.95                                                                                                               |
| <b>Val</b>                 | 8.91       | 4.57       | 1.96       | $\gamma$ CH <sub>3</sub> 0.91                                                                                                                     |
| <b><math>D^1</math>Pro</b> | —          | 4.36       | 2.25, 1.99 | $\gamma$ CH <sub>2</sub> 2.11, 2.05<br>$\delta$ CH <sub>2</sub> 3.86                                                                              |
| <b>Gly</b>                 | 8.68       | 3.99, 3.77 | —          | —                                                                                                                                                 |
| <b>Orn</b>                 | 7.96       | 4.56       | 1.80       | $\gamma$ CH <sub>2</sub> 1.68<br>$\delta$ CH <sub>2</sub> 2.99<br>$\delta$ NH <sub>3</sub> <sup>+</sup> 7.67                                      |
| <b>Lys</b>                 | 8.58       | 4.53       | 1.62, 1.53 | $\gamma$ CH <sub>2</sub> 1.12<br>$\delta$ CH <sub>2</sub> 1.33<br>$\epsilon$ CH <sub>2</sub> 2.59<br>$\epsilon$ NH <sub>3</sub> <sup>+</sup> 7.43 |
| <b>Ile</b>                 | 9.04       | 4.43       | 1.88       | $\gamma$ CH <sub>3</sub> 0.86<br>$\gamma$ CH <sub>2</sub> 1.38, 1.20<br>$\delta$ CH <sub>3</sub> 0.79                                             |
| <b>Leu</b>                 | 8.72       | 4.16       | 1.60, 1.44 | $\gamma$ CH 1.44<br>$\delta$ CH <sub>3</sub> 0.73, 0.63                                                                                           |
| <b>Gln</b>                 | 8.52       | 4.29       | 2.02, 1.83 | $\gamma$ CH <sub>2</sub> 2.37<br>$\delta$ NH 7.49, 7.04                                                                                           |
| <b>-NH<sub>2</sub></b>     | 7.84, 7.22 |            |            |                                                                                                                                                   |
