# Supplementary material
Source: PubMed Central journal article supplement (PMC59824)
Supplement: pnas_211536998_11.pdf [file pnas_211536998_11.pdf]

Supporting information for Stanger *et al.* (October 2, 2001) *Proc. Natl. Acad. Sci. USA*, 10.1073/pnas.211536998.

**Table 6.** Proton resonances (ppm) for  $^L\mathbf{P}$  in 9:1 H<sub>2</sub>O/D<sub>2</sub>O (4°C)

| Residue                | N-H        | $\alpha$ H | $\beta$ H  | Others                                                                                                                                            |
|------------------------|------------|------------|------------|---------------------------------------------------------------------------------------------------------------------------------------------------|
| <b>Arg</b>             | —          | 4.00       | 1.87       | $\gamma$ CH <sub>2</sub> 1.57<br>$\delta$ CH <sub>2</sub> 3.18<br>$\epsilon$ NH 7.24<br>NH <sub>2</sub> <sup>+</sup> 6.93, 6.56                   |
| <b>Tyr</b>             | 8.86       | 4.60       | 3.00, 2.91 | 2,6 H 7.09<br>3,5 H 6.80                                                                                                                          |
| <b>Val</b>             | 8.11       | 3.94       | 1.86       | $\gamma$ CH <sub>3</sub> 0.84                                                                                                                     |
| <b>Glu</b>             | 8.42       | 4.18       | 1.94       | $\gamma$ CH <sub>2</sub> 2.24                                                                                                                     |
| <b>Val</b>             | 8.46       | 4.38       | 2.05       | $\gamma$ CH <sub>3</sub> 0.94                                                                                                                     |
| <b>Pro</b>             | —          | 4.39       | 2.20, 1.97 | $\gamma$ CH <sub>2</sub> 2.04<br>$\delta$ CH <sub>2</sub> 3.86, 3.68                                                                              |
| <b>Gly</b>             | 8.60       | 3.94       | —          | —                                                                                                                                                 |
| <b>Orn</b>             | 8.32       | 4.34       | 1.83       | $\gamma$ CH <sub>2</sub> 1.72<br>$\delta$ CH <sub>2</sub> 3.00<br>$\delta$ NH <sub>3</sub> <sup>+</sup> 7.67                                      |
| <b>Lys</b>             | 8.52       | 4.29       | 1.73       | $\gamma$ CH <sub>2</sub> 1.40<br>$\delta$ CH <sub>2</sub> 1.67<br>$\epsilon$ CH <sub>2</sub> 2.97<br>$\epsilon$ NH <sub>3</sub> <sup>+</sup> 7.59 |
| <b>Ile</b>             | 8.43       | 4.11       | 1.82       | $\gamma$ CH <sub>3</sub> 0.85<br>$\gamma$ CH <sub>2</sub> 1.47, 1.17<br>$\delta$ CH <sub>3</sub> 0.88                                             |
| <b>Leu</b>             | 8.51       | 4.39       | 1.63, 1.56 | $\gamma$ CH 1.63<br>$\delta$ CH <sub>3</sub> 0.91, 0.84                                                                                           |
| <b>Gln</b>             | 8.48       | 4.27       | 2.07, 1.97 | $\gamma$ CH <sub>2</sub> 2.25<br>$\delta$ NH 7.63, 6.96                                                                                           |
| <b>-NH<sub>2</sub></b> | 7.70, 7.20 |            |            |                                                                                                                                                   |
