# Supplementary material
Source: PubMed Central journal article supplement (PMC59824)
Supplement: pnas_211536998_12.pdf [file pnas_211536998_12.pdf]

Supporting information for Stanger *et al.* (October 2, 2001) *Proc. Natl. Acad. Sci. USA*, 10.1073/pnas.211536998.

**Table 7.** Proton resonances (ppm) for  $D$ **P-TT** in 9:1 H<sub>2</sub>O/D<sub>2</sub>O (4°C)

| Residue        | N-H  | $\alpha$ H | $\beta$ H  | Others                                                                                                                                            |
|----------------|------|------------|------------|---------------------------------------------------------------------------------------------------------------------------------------------------|
| <b>Thr</b>     | —    | 3.94       | 4.12       | $\gamma$ CH <sub>3</sub> 1.29                                                                                                                     |
| <b>Thr</b>     | 8.90 | 4.57       | 3.99       | $\gamma$ CH <sub>3</sub> 1.08                                                                                                                     |
| <b>Arg</b>     | 8.65 | 4.48       | 1.77, 1.69 | $\gamma$ CH <sub>2</sub> 1.48<br>$\delta$ CH <sub>2</sub> 3.12<br>$\epsilon$ NH 7.17<br>NH <sub>2</sub> <sup>+</sup> 6.93, 6.51                   |
| <b>Tyr</b>     | 8.61 | 5.12       | 2.76       | 2,6 H 6.93<br>3,5 H 6.77                                                                                                                          |
| <b>Val</b>     | 8.99 | 4.37       | 1.98       | $\gamma$ CH <sub>3</sub> 0.86, 0.83                                                                                                               |
| <b>Glu</b>     | 8.64 | 4.95       | 1.96, 1.87 | $\gamma$ CH <sub>2</sub> 2.21                                                                                                                     |
| <b>Val</b>     | 8.97 | 4.59       | 1.96       | $\gamma$ CH <sub>3</sub> 0.92                                                                                                                     |
| $D$ <b>Pro</b> | —    | 4.37       | 2.38, 1.99 | $\gamma$ CH <sub>2</sub> 2.11, 2.06<br>$\delta$ CH <sub>2</sub> 3.87                                                                              |
| <b>Gly</b>     | 8.73 | 4.00, 3.76 | —          | —                                                                                                                                                 |
| <b>Orn</b>     | 7.95 | 4.60       | 1.80       | $\gamma$ CH <sub>2</sub> 1.69<br>$\delta$ CH <sub>2</sub> 2.99<br>$\delta$ NH <sub>3</sub> <sup>+</sup> 7.69                                      |
| <b>Lys</b>     | 8.60 | 4.59       | 1.62, 1.53 | $\gamma$ CH <sub>2</sub> 1.15<br>$\delta$ CH <sub>2</sub> 1.33<br>$\epsilon$ CH <sub>2</sub> 2.58<br>$\epsilon$ NH <sub>3</sub> <sup>+</sup> 7.44 |
| <b>Ile</b>     | 9.15 | 4.50       | 1.91       | $\gamma$ CH <sub>3</sub> 0.88<br>$\gamma$ CH <sub>2</sub> 1.37, 1.20<br>$\delta$ CH <sub>3</sub> 0.80                                             |
| <b>Leu</b>     | 8.68 | 4.18       | 1.54, 1.45 | $\gamma$ CH 1.35<br>$\delta$ CH <sub>3</sub> 0.66, 0.61                                                                                           |
| <b>Gln</b>     | 8.83 | 4.49       | 2.02, 1.83 | $\gamma$ CH <sub>2</sub> 2.25<br>$\delta$ NH 7.46, 7.02                                                                                           |
| <b>Thr</b>     | 8.61 | 4.59       | 4.20       | $\gamma$ CH <sub>3</sub> 1.18                                                                                                                     |

|                        |            |      |      |                               |
|------------------------|------------|------|------|-------------------------------|
| <b>Thr</b>             | 8.30       | 4.35 | 4.24 | $\gamma$ CH <sub>3</sub> 1.16 |
| <b>-NH<sub>2</sub></b> | 7.76, 7.27 |      |      |                               |
