# Supplementary material
Source: PubMed Central journal article supplement (PMC59824)
Supplement: pnas_211536998_13.pdf [file pnas_211536998_13.pdf]

Supporting information for Stanger *et al.* (October 2, 2001) *Proc. Natl. Acad. Sci. USA*, 10.1073/pnas.211536998.

**Table 8.** Proton resonances (ppm) for  $^D\text{P-TT}_2$  in 9:1 H<sub>2</sub>O/D<sub>2</sub>O (4°C)

| Residue  | N-H  | $\alpha$ H | $\beta$ H  | Others                                                                                                                                            |
|----------|------|------------|------------|---------------------------------------------------------------------------------------------------------------------------------------------------|
| Thr      | —    | 3.97       | 4.16       | $\gamma$ CH <sub>3</sub> 1.30                                                                                                                     |
| Thr      | 9.02 | 4.78       | 4.12       | $\gamma$ CH <sub>3</sub> 1.18                                                                                                                     |
| Thr      | 8.71 | 4.51       | 4.14       | $\gamma$ CH <sub>3</sub> 1.17                                                                                                                     |
| Thr      | 8.46 | 4.72       | 3.95       | $\gamma$ CH <sub>3</sub> 1.06                                                                                                                     |
| Arg      | 8.59 | 4.51       | 1.79, 1.71 | $\gamma$ CH <sub>2</sub> 1.48<br>$\delta$ CH <sub>2</sub> 3.11<br>$\epsilon$ NH 7.15<br>NH <sub>2</sub> <sup>+</sup> 6.92, 6.50                   |
| Tyr      | 8.65 | 5.15       | 2.77, 2.72 | 2,6 H 6.93<br>3,5 H 6.77                                                                                                                          |
| Val      | 9.08 | 4.40       | 1.99       | $\gamma$ CH <sub>3</sub> 0.84                                                                                                                     |
| Glu      | 8.64 |            | 1.97, 1.87 | $\gamma$ CH <sub>2</sub> 2.23                                                                                                                     |
| Val      | 9.00 | 4.61       | 1.96       | $\gamma$ CH <sub>3</sub> 0.92                                                                                                                     |
| $^D$ Pro | —    | 4.36       | 2.37, 1.99 | $\gamma$ CH <sub>2</sub> 2.12, 2.06<br>$\delta$ CH <sub>2</sub> 3.87                                                                              |
| Gly      | 8.73 | 4.03, 3.76 | —          | —                                                                                                                                                 |
| Orn      | 7.93 | 4.61       | 1.80       | $\gamma$ CH <sub>2</sub> 1.68<br>$\delta$ CH <sub>2</sub> 3.00<br>$\delta$ NH <sub>3</sub> <sup>+</sup> 7.68                                      |
| Lys      | 8.59 | 4.65       | 1.62, 1.53 | $\gamma$ CH <sub>2</sub> 1.14<br>$\delta$ CH <sub>2</sub> 1.33<br>$\epsilon$ CH <sub>2</sub> 2.57<br>$\epsilon$ NH <sub>3</sub> <sup>+</sup> 7.41 |
| Ile      | 9.20 | 4.54       | 1.90       | $\gamma$ CH <sub>3</sub> 0.89<br>$\gamma$ CH <sub>2</sub> 1.38, 1.20<br>$\delta$ CH <sub>3</sub> 0.80                                             |
| Leu      | 8.66 | 4.16       | 1.53, 1.39 | $\gamma$ CH 1.30<br>$\delta$ CH <sub>3</sub> 0.62, 0.53                                                                                           |
| Gln      | 8.92 | 4.53       | 2.01, 1.82 | $\gamma$ CH <sub>2</sub> 2.24, 2.19                                                                                                               |

|                         |            |      |      |                               |
|-------------------------|------------|------|------|-------------------------------|
|                         |            |      |      | $\delta$ NH 7.45, 6.99        |
| <b>Thr</b> <sup>†</sup> | 8.69       | 4.72 | 4.10 | $\gamma$ CH <sub>3</sub> 1.14 |
| <b>Thr</b> <sup>†</sup> | 8.63       | 4.54 | 4.15 | $\gamma$ CH <sub>3</sub> 1.16 |
| <b>Thr</b>              | 8.62       | 4.68 | 4.17 | $\gamma$ CH <sub>3</sub> 1.18 |
| <b>Thr</b>              | 8.35       | 4.36 | 4.25 | $\gamma$ CH <sub>3</sub> 1.18 |
| <b>-NH<sub>2</sub></b>  | 7.76, 7.28 |      |      |                               |

<sup>†</sup> The proton spin systems for the Thr-17 and Thr-18 residues could not be distinguished. The resonances in this table reflect one of two assignment possibilities.
