# Supplementary material
Source: PubMed Central journal article supplement (PMC59824)
Supplement: pnas_211536998_14.pdf [file pnas_211536998_14.pdf]

Supporting information for Stanger *et al.* (October 2, 2001) *Proc. Natl. Acad. Sci. USA*, 10.1073/pnas.211536998.

**Table 9.** Proton resonances (ppm) for  $^D\text{P-ST}$  in 9:1  $\text{H}_2\text{O}/\text{D}_2\text{O}$  ( $4^\circ\text{C}$ )

| Residue  | N-H  | $\alpha$ H | $\beta$ H  | Others                                                                                                                                            |
|----------|------|------------|------------|---------------------------------------------------------------------------------------------------------------------------------------------------|
| Ser      | —    | 4.22       | 4.00, 3.96 | —                                                                                                                                                 |
| Thr      | 8.79 | 4.52       | 4.00       | $\gamma$ CH <sub>3</sub> 1.08                                                                                                                     |
| Arg      | 8.58 | 4.46       | 1.77       | $\gamma$ CH <sub>2</sub> 1.48<br>$\delta$ CH <sub>2</sub> 3.12<br>$\epsilon$ NH 7.14<br>NH <sub>2</sub> <sup>+</sup> 6.91, 6.48                   |
| Tyr      | 8.58 | 5.11       | 2.75       | 2,6 H 6.91<br>3,5 H 6.77                                                                                                                          |
| Val      | 8.96 | 4.36       | 1.99       | $\gamma$ CH <sub>3</sub> 0.86, 0.83                                                                                                               |
| Glu      | 8.64 | 4.93       | 1.95, 1.87 | $\gamma$ CH <sub>2</sub> 2.24, 2.21                                                                                                               |
| Val      | 8.96 | 4.60       | 1.96       | $\gamma$ CH <sub>3</sub> 0.93, 0.91                                                                                                               |
| $^D$ Pro | —    | 4.36       | 2.36, 1.98 | $\gamma$ CH <sub>2</sub> 2.10, 2.05<br>$\delta$ CH <sub>2</sub> 3.86                                                                              |
| Gly      | 8.71 | 4.00, 3.75 | —          | —                                                                                                                                                 |
| Orn      | 7.94 | 4.59       | 1.80       | $\gamma$ CH <sub>2</sub> 1.68<br>$\delta$ CH <sub>2</sub> 2.99<br>$\delta$ NH <sub>3</sub> <sup>+</sup> 7.68                                      |
| Lys      | 8.59 | 4.58       | 1.62, 1.53 | $\gamma$ CH <sub>2</sub> 1.11<br>$\delta$ CH <sub>2</sub> 1.33<br>$\epsilon$ CH <sub>2</sub> 2.58<br>$\epsilon$ NH <sub>3</sub> <sup>+</sup> 7.43 |
| Ile      | 9.13 | 4.49       | 1.90       | $\gamma$ CH <sub>3</sub> 0.87<br>$\gamma$ CH <sub>2</sub> 1.37, 1.21<br>$\delta$ CH <sub>3</sub> 0.79                                             |
| Leu      | 8.68 | 4.15       | 1.54, 1.45 | $\gamma$ CH 1.38<br>$\delta$ CH <sub>3</sub> 0.66, 0.61                                                                                           |
| Gln      | 8.80 | 4.47       | 2.03, 1.82 | $\gamma$ CH <sub>2</sub> 2.26<br>$\delta$ NH 7.44, 7.01                                                                                           |
| Thr      | 8.55 | 4.50       | 4.21       | $\gamma$ CH <sub>3</sub> 1.17                                                                                                                     |

|                        |            |      |            |   |
|------------------------|------------|------|------------|---|
| <b>Ser</b>             | 8.43       | 4.43 | 3.87, 3.83 | — |
| <b>-NH<sub>2</sub></b> | 7.75, 7.27 |      |            |   |
