# Supplementary material
Source: PubMed Central journal article supplement (PMC59824)
Supplement: pnas_211536998_15.pdf [file pnas_211536998_15.pdf]

Supporting information for Stanger *et al.* (October 2, 2001) *Proc. Natl. Acad. Sci. USA*, 10.1073/pnas.211536998.

**Table 10.** Proton resonances (ppm) for  $^D\text{P-ST}_2$  in 9:1  $\text{H}_2\text{O}/\text{D}_2\text{O}$  (4°C)

| Residue  | N-H  | $\alpha$ H | $\beta$ H  | Others                                                                                                                                            |
|----------|------|------------|------------|---------------------------------------------------------------------------------------------------------------------------------------------------|
| Ser      | —    | 4.24       | 4.00       | —                                                                                                                                                 |
| Thr      | 8.82 | 4.52       | 4.19       | $\gamma$ CH <sub>3</sub> 1.21                                                                                                                     |
| Ser      | 8.63 | 4.57       | 3.84       | —                                                                                                                                                 |
| Thr      | 8.35 | 4.46       | 4.04       | $\gamma$ CH <sub>3</sub> 1.07                                                                                                                     |
| Arg      | 8.47 | 4.45       | 1.75, 1.67 | $\gamma$ CH <sub>2</sub> 1.48<br>$\delta$ CH <sub>2</sub> 3.11<br>$\epsilon$ NH 7.14<br>NH <sub>2</sub> <sup>+</sup> 6.91, 6.49                   |
| Tyr      | 8.52 | 5.11       | 2.74       | 2,6 H 6.91<br>3,5 H 6.76                                                                                                                          |
| Val      | 8.97 | 4.36       | 1.99       | $\gamma$ CH <sub>3</sub> 0.86, 0.81                                                                                                               |
| Glu      | 8.63 | 4.94       | 1.95, 1.85 | $\gamma$ CH <sub>2</sub> 2.22                                                                                                                     |
| Val      | 8.95 | 4.58       | 1.96       | $\gamma$ CH <sub>3</sub> 0.90                                                                                                                     |
| $^D$ Pro | —    | 4.35       | 2.36, 1.98 | $\gamma$ CH <sub>2</sub> 2.11, 2.04<br>$\delta$ CH <sub>2</sub> 3.85                                                                              |
| Gly      | 8.70 | 4.00, 3.75 | —          | —                                                                                                                                                 |
| Orn      | 7.93 | 4.58       | 1.79       | $\gamma$ CH <sub>2</sub> 1.67<br>$\delta$ CH <sub>2</sub> 2.98<br>$\delta$ NH <sub>3</sub> <sup>+</sup> 7.67                                      |
| Lys      | 8.59 | 4.59       | 1.61, 1.53 | $\gamma$ CH <sub>2</sub> 1.10<br>$\delta$ CH <sub>2</sub> 1.30<br>$\epsilon$ CH <sub>2</sub> 2.55<br>$\epsilon$ NH <sub>3</sub> <sup>+</sup> 7.41 |
| Ile      | 9.12 | 4.48       | 1.88       | $\gamma$ CH <sub>3</sub> 0.86<br>$\gamma$ CH <sub>2</sub> 1.38, 1.17<br>$\delta$ CH <sub>3</sub> 0.78                                             |
| Leu      | 8.66 | 4.15       | 1.52, 1.44 | $\gamma$ CH 1.38<br>$\delta$ CH <sub>3</sub> 0.64, 0.61                                                                                           |
| Gln      | 8.78 | 4.44       | 2.02, 1.82 | $\gamma$ CH <sub>2</sub> 2.23                                                                                                                     |

|                        |            |      |            |                               |
|------------------------|------------|------|------------|-------------------------------|
|                        |            |      |            | $\delta$ NH 7.43, 7.01        |
| <b>Thr</b>             | 8.51       | 4.50 | 4.19       | $\gamma$ CH <sub>3</sub> 1.16 |
| <b>Ser</b>             | 8.58       | 4.42 | 3.87, 3.84 | —                             |
| <b>Thr</b>             | 8.45       | 4.46 | 4.28       | $\gamma$ CH <sub>3</sub> 1.18 |
| <b>Ser</b>             | 8.33       | 4.57 | 3.85       | —                             |
| <b>-NH<sub>2</sub></b> | 7.68, 7.26 |      |            |                               |
