# Supplementary material
Source: PubMed Central journal article supplement (PMC59824)
Supplement: pnas_211536998_17.pdf [file pnas_211536998_17.pdf]

Supporting information for Stanger *et al.* (October 2, 2001) *Proc. Natl. Acad. Sci. USA*, 10.1073/pnas.211536998.

**Table 12.** Proton resonances (ppm) for  $^D$ P-AT<sub>2</sub> in 9:1 H<sub>2</sub>O/D<sub>2</sub>O (4°C)

| Residue  | N-H  | $\alpha$ H | $\beta$ H  | Others                                                                                                                                            |
|----------|------|------------|------------|---------------------------------------------------------------------------------------------------------------------------------------------------|
| Ala      | —    | 4.08       | 1.54       | —                                                                                                                                                 |
| Thr      | 8.66 | 4.33       | 4.12       | $\gamma$ CH <sub>3</sub> 1.23                                                                                                                     |
| Ala      | 8.66 | 4.33       | 1.39       | —                                                                                                                                                 |
| Thr      | 8.30 | 4.31       | 4.01       | $\gamma$ CH <sub>3</sub> 1.08                                                                                                                     |
| Arg      | 8.47 | 4.44       | 1.75, 1.68 | $\gamma$ CH <sub>2</sub> 1.49<br>$\delta$ CH <sub>2</sub> 3.14<br>$\epsilon$ NH 7.15<br>NH <sub>2</sub> <sup>+</sup> 6.88, 6.49                   |
| Tyr      | 8.48 | 5.08       | 2.76       | 2,6 H 6.91<br>3,5 H 6.76                                                                                                                          |
| Val      | 8.92 | 4.36       | 1.98       | $\gamma$ CH <sub>3</sub> 0.87, 0.84                                                                                                               |
| Glu      | 8.58 |            | 1.87       | $\gamma$ CH <sub>2</sub> 2.22, 1.95                                                                                                               |
| Val      | 8.90 | 4.60       | 1.96       | $\gamma$ CH <sub>3</sub> 0.92                                                                                                                     |
| $^D$ Pro | —    | 4.36       | 2.36, 1.99 | $\gamma$ CH <sub>2</sub> 2.09<br>$\delta$ CH <sub>2</sub> 3.86                                                                                    |
| Gly      | 8.66 | 4.00, 3.76 | —          | —                                                                                                                                                 |
| Orn      | 7.93 | 4.58       | 1.80       | $\gamma$ CH <sub>2</sub> 1.68<br>$\delta$ CH <sub>2</sub> 2.99<br>$\delta$ NH <sub>3</sub> <sup>+</sup> 7.65                                      |
| Lys      | 8.54 | 4.59       | 1.61, 1.52 | $\gamma$ CH <sub>2</sub> 1.11<br>$\delta$ CH <sub>2</sub> 1.32<br>$\epsilon$ CH <sub>2</sub> 2.59<br>$\epsilon$ NH <sub>3</sub> <sup>+</sup> 7.40 |
| Ile      | 9.07 | 4.48       | 1.89       | $\gamma$ CH <sub>3</sub> 0.87<br>$\gamma$ CH <sub>2</sub> 1.38, 1.19<br>$\delta$ CH <sub>3</sub> 0.78                                             |
| Leu      | 8.63 | 4.17       | 1.53, 1.47 | $\gamma$ CH 1.41<br>$\delta$ CH <sub>3</sub> 0.67                                                                                                 |
| Gln      | 8.68 | 4.41       | 2.02, 1.83 | $\gamma$ CH <sub>2</sub> 2.26<br>$\delta$ NH 7.42, 6.97                                                                                           |

|                        |            |      |      |                               |
|------------------------|------------|------|------|-------------------------------|
| <b>Thr</b>             | 8.31       | 4.32 | 4.19 | $\gamma$ CH <sub>3</sub> 1.18 |
| <b>Ala</b>             | 8.48       | 4.38 | 1.38 | —                             |
| <b>Thr</b>             | 8.22       | 4.28 | 4.19 | $\gamma$ CH <sub>3</sub> 1.19 |
| <b>Ala</b>             | 8.36       | 4.28 | 1.39 | —                             |
| <b>-NH<sub>2</sub></b> | 7.62, 7.11 |      |      |                               |
