# Supplementary material
Source: PubMed Central journal article supplement (PMC59824)
Supplement: pnas_211536998_18.pdf [file pnas_211536998_18.pdf]

Supporting information for Stanger *et al.* (October 2, 2001) *Proc. Natl. Acad. Sci. USA*, 10.1073/pnas.211536998.

**Table 13.** Proton resonances (ppm) for <sup>D</sup>P-ST/Y in 9:1 H<sub>2</sub>O/D<sub>2</sub>O (4°C)

| Residue          | N-H  | α H        | β H        | Others                                                                                                            |
|------------------|------|------------|------------|-------------------------------------------------------------------------------------------------------------------|
| Ser              | —    | 4.25       | 4.00       | —                                                                                                                 |
| Thr              | 8.76 | 4.58       | 3.96       | γ CH <sub>3</sub> 1.01                                                                                            |
| Arg              | 8.53 | 4.48       | 1.77, 1.71 | γ CH <sub>2</sub> 1.46<br>δ CH <sub>2</sub> 3.11<br>ε NH 7.14<br>NH <sub>2</sub> <sup>+</sup> 6.90, 6.49          |
| Tyr              | 8.60 | 5.14       | 2.76       | 2,6 H 6.92<br>3,5 H 6.78                                                                                          |
| Val              | 8.96 | 4.38       | 1.99       | γ CH <sub>3</sub> 0.96, 0.84                                                                                      |
| Glu              | 8.66 | 4.98       | 1.97, 1.89 | γ CH <sub>2</sub> 2.26                                                                                            |
| Val              | 8.98 | 4.61       | 1.97       | γ CH <sub>3</sub> 0.92                                                                                            |
| <sup>D</sup> Pro | —    | 4.37       | 2.38, 2.01 | γ CH <sub>2</sub> 2.12, 2.07<br>δ CH <sub>2</sub> 3.88                                                            |
| Gly              | 8.72 | 4.02, 3.78 | —          | —                                                                                                                 |
| Orn              | 7.95 | 4.62       | 1.82       | γ CH <sub>2</sub> 1.69<br>δ CH <sub>2</sub> 3.01<br>δ NH <sub>3</sub> <sup>+</sup> 7.69                           |
| Lys              | 8.60 | 4.60       | 1.62, 1.55 | γ CH <sub>2</sub> 1.13<br>δ CH <sub>2</sub> 1.34<br>ε CH <sub>2</sub> 2.58<br>ε NH <sub>3</sub> <sup>+</sup> 7.43 |
| Ile              | 9.14 | 4.51       | 1.92       | γ CH <sub>3</sub> 0.88<br>γ CH <sub>2</sub> 1.39, 1.22<br>δ CH <sub>3</sub> 0.79                                  |
| Leu              | 8.65 | 4.14       | 1.43       | γ CH <sub>2</sub> 1.30<br>δ CH <sub>3</sub> 0.61                                                                  |
| Gln              | 8.71 | 4.39       | 1.94, 1.78 | γ CH <sub>2</sub> 2.18<br>δ NH 7.44, 7.02                                                                         |
| Tyr              | 8.66 | 4.67       | 3.01, 2.94 | 2,6 H 7.13                                                                                                        |

|                        |            |      |      |            |
|------------------------|------------|------|------|------------|
|                        |            |      |      | 3,5 H 6.80 |
| <b>Ser</b>             | 8.36       | 4.35 | 3.82 | —          |
| <b>-NH<sub>2</sub></b> | 7.33, 7.22 |      |      |            |
