# Supplementary material
Source: PubMed Central journal article supplement (PMC59824)
Supplement: pnas_211536998_19.pdf [file pnas_211536998_19.pdf]

Supporting information for Stanger *et al.* (October 2, 2001) *Proc. Natl. Acad. Sci. USA*, 10.1073/pnas.211536998.

**Table 14.** Proton resonances (ppm) for  $D$ **P-ST/Y**<sub>2</sub> in 9:1 H<sub>2</sub>O/D<sub>2</sub>O (4°C)

| Residue        | N-H  | $\alpha$ H | $\beta$ H  | Others                                                                                                                                            |
|----------------|------|------------|------------|---------------------------------------------------------------------------------------------------------------------------------------------------|
| Ser            | —    | 4.24       | 4.00       | —                                                                                                                                                 |
| Thr            | 8.86 | 4.55       | 4.17       | $\gamma$ CH <sub>3</sub> 1.20                                                                                                                     |
| Ser            | 8.69 | 4.60       | 3.84       | —                                                                                                                                                 |
| Thr            | 8.30 | 4.53       | 3.95       | $\gamma$ CH <sub>3</sub> 0.93                                                                                                                     |
| Arg            | 8.38 | 4.42       | 1.72, 1.64 | $\gamma$ CH <sub>2</sub> 1.41<br>$\delta$ CH <sub>2</sub> 3.05<br>$\epsilon$ NH 7.09<br>NH <sub>2</sub> <sup>+</sup> 6.87, 6.47                   |
| Tyr            | 8.54 | 5.13       | 2.71       | 2,6 H 6.90<br>3,5 H 6.75                                                                                                                          |
| Val            | 8.96 | 4.36       | 1.95       | $\gamma$ CH <sub>3</sub> 0.90, 0.80                                                                                                               |
| Glu            | 8.65 |            | 1.94, 1.85 | $\gamma$ CH <sub>2</sub> 2.21                                                                                                                     |
| Val            | 8.96 | 4.59       | 1.96       | $\gamma$ CH <sub>3</sub> 0.90, 0.80                                                                                                               |
| $D$ <b>Pro</b> | —    | 4.37       | 2.37, 1.96 | $\gamma$ CH <sub>2</sub> 2.13, 2.08<br>$\delta$ CH <sub>2</sub> 3.88                                                                              |
| Gly            | 8.71 | 4.00, 3.74 | —          | —                                                                                                                                                 |
| Orn            | 7.93 | 4.58       | 1.80       | $\gamma$ CH <sub>2</sub> 1.68<br>$\delta$ CH <sub>2</sub> 2.99<br>$\delta$ NH <sub>3</sub> <sup>+</sup> 7.69                                      |
| Lys            | 8.58 | 4.60       | 1.60, 1.50 | $\gamma$ CH <sub>2</sub> 1.08<br>$\delta$ CH <sub>2</sub> 1.30<br>$\epsilon$ CH <sub>2</sub> 2.54<br>$\epsilon$ NH <sub>3</sub> <sup>+</sup> 7.41 |
| Ile            | 9.15 | 4.49       | 1.88       | $\gamma$ CH <sub>3</sub> 0.86<br>$\gamma$ CH <sub>2</sub> 1.36, 1.18<br>$\delta$ CH <sub>3</sub> 0.77                                             |
| Leu            | 8.61 | 4.10       | 1.39       | $\gamma$ CH <sub>2</sub> 1.22<br>$\delta$ CH <sub>3</sub> 0.55                                                                                    |
| Gln            | 8.69 | 4.35       | 1.91, 1.73 | $\gamma$ CH <sub>2</sub> 2.14                                                                                                                     |

|                  |      |      |            |                          |
|------------------|------|------|------------|--------------------------|
|                  |      |      |            | $\delta$ NH 7.41, 7.00   |
| Tyr              | 8.56 | 4.60 | 2.77       | 2,6 H 7.03<br>3,5 H 6.73 |
| Ser              | 8.37 | 4.43 | 3.69       | —                        |
| Tyr              | 8.44 | 4.68 | 3.02, 2.93 | 2,6 H 7.15<br>3,5 H 6.79 |
| Ser              | 8.29 | 4.35 | 3.80       | —                        |
| -NH <sub>2</sub> | 7.25 |      |            |                          |
