# Supplementary material
Source: PubMed Central journal article supplement (PMC59824)

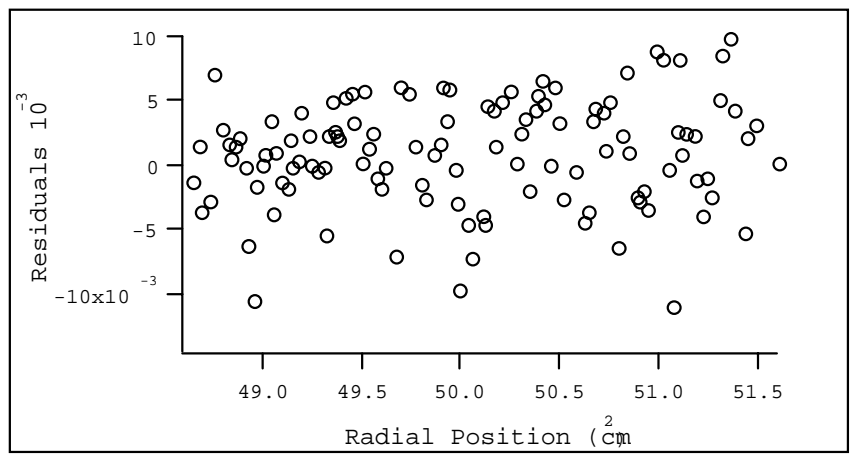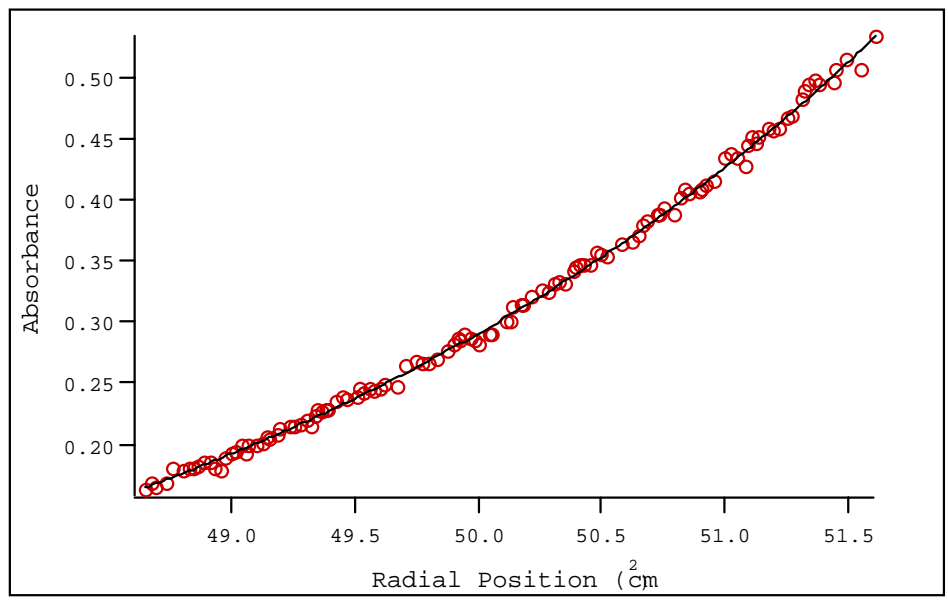

Supplement: pnas_211536998_4.pdf [file pnas_211536998_4.pdf]

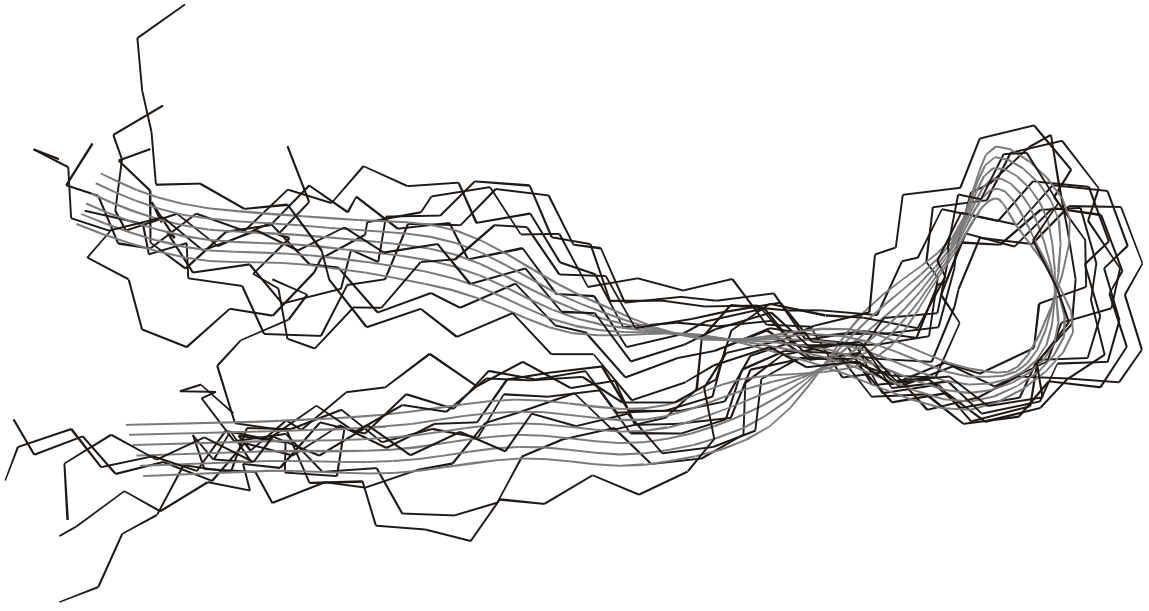

Supplement: pnas_211536998_5.pdf [file pnas_211536998_5.pdf]

**A**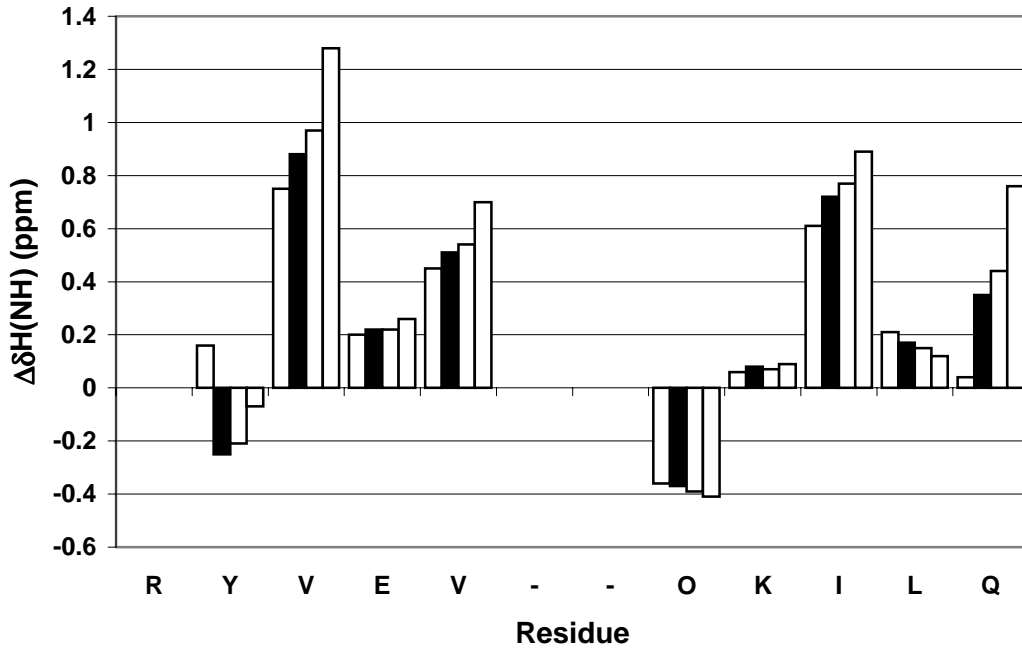**B**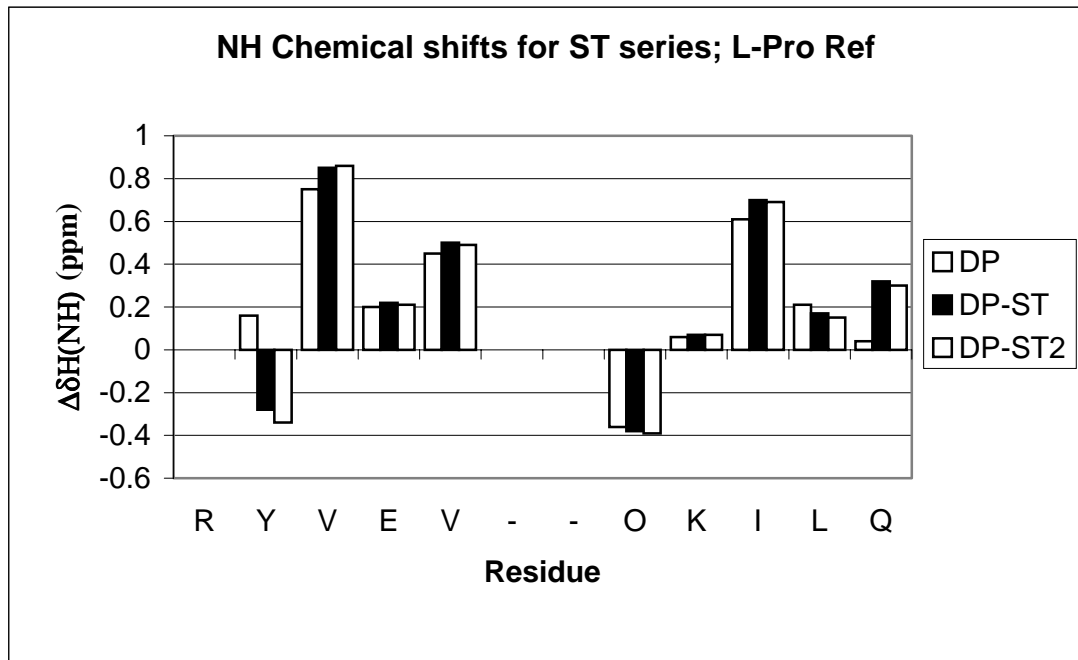

**C**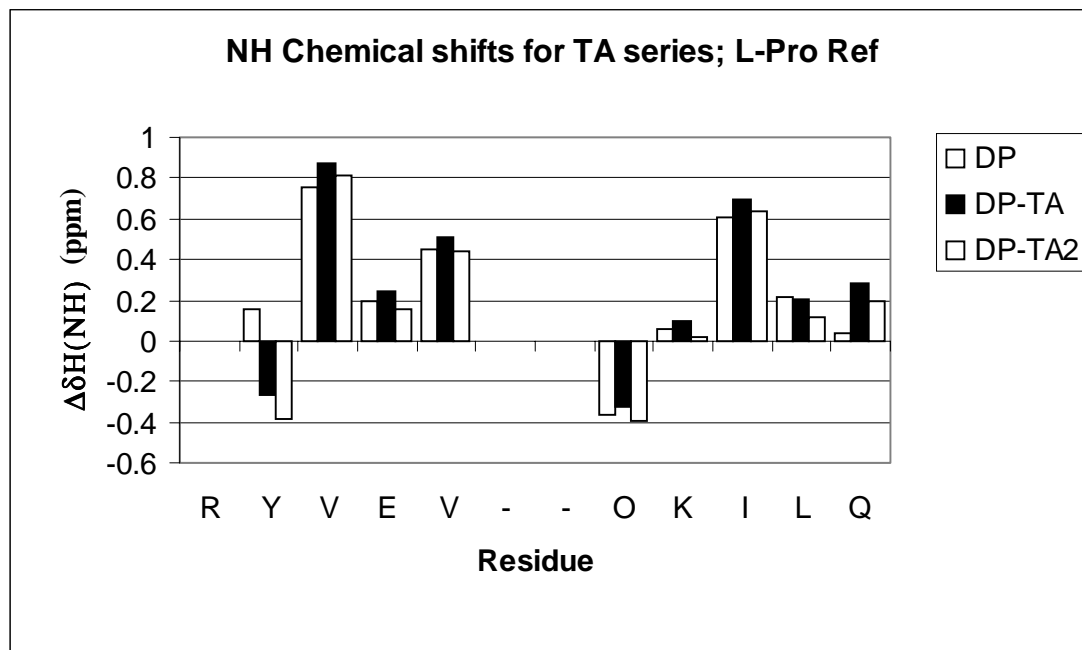**D**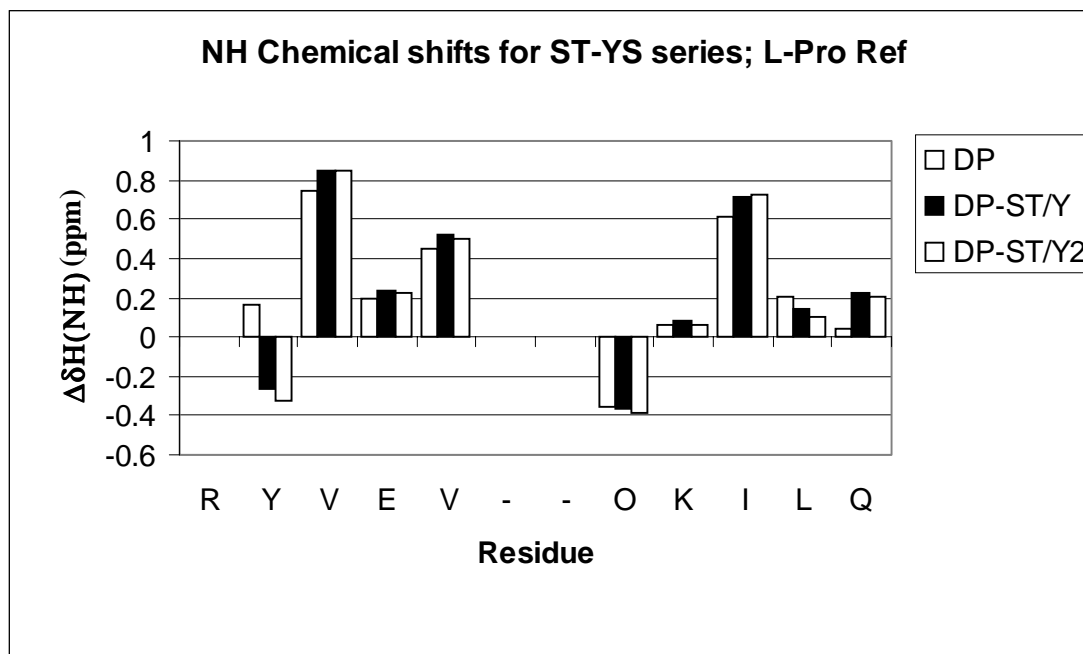

Supplement: pnas_211536998_6.pdf [file pnas_211536998_6.pdf]
